# Supplementary material
Source: PubMed Central journal article supplement (PMC1450141)
Supplement: pnas_0600160103_1.pdf [file pnas_0600160103_1.pdf]

**Table 1. Likelihood scores, model parameters, and likelihood-ratio test results for site-model analyses and branch-site-model analyses**

| Site models                  | Model parameters |       |       |       |       |         |       | Likelihood ratio test details |                |    |         |
|------------------------------|------------------|-------|-------|-------|-------|---------|-------|-------------------------------|----------------|----|---------|
|                              | lnL              | w0    | p0    | w1    | p1    | w2      | p2    | Null model for LRT            | Test statistic | df | P value |
| M0                           | -13459.32        | 0.108 | 1.000 |       |       |         |       |                               |                |    |         |
| M3 -2 categories             | -13143.49        | 0.025 | 0.696 | 0.367 | 0.304 |         |       | M0                            | 663.306        | 5  | <0.0001 |
| M3 -3 categories             | -13127.67        | 0.013 | 0.568 | 0.173 | 0.309 | 0.598   | 0.123 |                               |                |    |         |
| M7                           | -13129.55        |       |       |       |       |         |       |                               |                |    |         |
| M8                           | -13128.97        |       |       | 1.000 | 0.012 |         |       | M7                            | 1.145          | 2  | 0.5642  |
| <b>Branch-site model A</b>   |                  |       |       |       |       |         |       |                               |                |    |         |
| <i>E. electricus</i> null    | -13196.91        | 0.060 | 0.654 | 1.000 | 0.098 | 1.000   | 0.248 |                               |                |    |         |
| <i>E. electricus</i> A       | -13192.36        | 0.060 | 0.768 | 1.000 | 0.114 | 3.892   | 0.118 | <i>E. electricus</i> null     | 9.107          | 1  | 0.0025  |
| <i>B. pinnicaudatus</i> null | -13216.23        | 0.063 | 0.805 | 1.000 | 0.124 | 1.000   | 0.071 |                               |                |    |         |
| <i>B. pinnicaudatus</i> A    | -13208.66        | 0.065 | 0.849 | 1.000 | 0.130 | 120.130 | 0.021 | <i>B. pinnicaudatus</i> null  | 15.143         | 1  | 0.0001  |
| <i>S. macrurus</i> null      | -13199.54        | 0.059 | 0.666 | 1.000 | 0.099 | 1.000   | 0.234 |                               |                |    |         |
| <i>S. macrurus</i> A         | -13198.74        | 0.060 | 0.724 | 1.000 | 0.107 | 1.731   | 0.170 | <i>S. macrurus</i> null       | 1.608          | 1  | 0.2048  |
| <i>A. leptorhynchus</i> null | -13224.54        | 0.066 | 0.862 | 1.000 | 0.138 | 1.000   | 0.000 |                               |                |    |         |
| <i>A. leptorhynchus</i> A    | -13224.54        | 0.066 | 0.862 | 1.000 | 0.138 | 1.000   | 0.000 | <i>A. leptorhynchus</i> null  | 0.000          | 1  | 0.9989  |
| <i>G. petersii</i> null      | -13203.14        | 0.059 | 0.739 | 1.000 | 0.114 | 1.000   | 0.147 |                               |                |    |         |
| <i>G. petersii</i> A         | -13202.79        | 0.059 | 0.762 | 1.000 | 0.117 | 1.431   | 0.121 | <i>G. petersii</i> null       | 0.692          | 1  | 0.4054  |
| Internal branch 1 null       | -13194.48        | 0.061 | 0.498 | 1.000 | 0.076 | 1.000   | 0.425 |                               |                |    |         |
| Internal branch 1 A          | -13186.11        | 0.061 | 0.781 | 1.000 | 0.118 | 12.996  | 0.101 | Internal branch 1 null        | 16.746         | 1  | <0.0001 |
| Internal branch 2 null       | -13218.99        | 0.064 | 0.585 | 1.000 | 0.091 | 1.000   | 0.324 |                               |                |    |         |

| Site models                | Model parameters |       |       |       |       |         |       | Likelihood ratio test details |                |    |         |
|----------------------------|------------------|-------|-------|-------|-------|---------|-------|-------------------------------|----------------|----|---------|
|                            | lnL              | w0    | p0    | w1    | p1    | w2      | p2    | Null model for LRT            | Test statistic | df | P value |
| Internal branch 2 A        | -13215.63        | 0.064 | 0.823 | 1.000 | 0.126 | 27.008  | 0.051 | Internal branch 2 null        | 6.709          | 1  | 0.0096  |
| Internal branch 3 null     | -13224.54        | 0.066 | 0.862 | 1.000 | 0.138 | 1.000   | 0.000 |                               |                |    |         |
| Internal branch 3 A        | -13224.54        | 0.066 | 0.862 | 1.000 | 0.138 | 33.585  | 0.000 | Internal branch 3 null        | 0.000          | 1  | 0.9989  |
| <b>Branch-site model B</b> |                  |       |       |       |       |         |       |                               |                |    |         |
| <i>E. electricus</i>       | -13117.64        | 0.025 | 0.644 | 0.371 | 0.244 | 3.710   | 0.112 | M3-2 categories               | 51.711         | 2  | <0.0001 |
| <i>B. pinnicaudatus</i>    | -13134.45        | 0.026 | 0.695 | 0.370 | 0.291 | 998.993 | 0.015 | M3-2 categories               | 18.087         | 2  | 0.0001  |
| <i>S. macrurus</i>         | -13122.59        | 0.024 | 0.623 | 0.370 | 0.240 | 1.947   | 0.137 | M3-2 categories               | 41.811         | 2  | <0.0001 |
| <i>A. leptorhynchus</i>    | -13143.12        | 0.024 | 0.543 | 0.370 | 0.238 | 0.061   | 0.218 | M3-2 categories               | 0.739          | 2  | 0.6912  |
| <i>G. petersii</i>         | -13130.56        | 0.023 | 0.650 | 0.374 | 0.261 | 1.557   | 0.090 | M3-2 categories               | 25.857         | 2  | <0.0001 |
| Internal branch 1          | -13110.77        | 0.024 | 0.649 | 0.365 | 0.263 | 11.107  | 0.088 | M3-2 categories               | 65.446         | 2  | 0.0001  |
| Internal branch 2          | -13139.98        | 0.025 | 0.682 | 0.365 | 0.292 | 13.101  | 0.027 | M3-2 categories               | 7.034          | 2  | 0.0297  |
| Internal branch 3          | -13140.21        | 0.025 | 0.368 | 0.379 | 0.161 | 0.000   | 0.471 | M3-2 categories               | 6.576          | 2  | 0.0373  |

Internal branch 1, branch ancestral to *E. electricus* plus *B. pinnicaudatus*; internal branch 2, branch ancestral to *E. electricus* plus *B. pinnicaudatus* plus *S. macrurus*; internal branch 3, branch ancestral to *E. electricus* plus *B. pinnicaudatus* plus *S. macrurus* plus *A. leptorhynchus*.
